# Supplementary material for: Deoxyelephantopin induces apoptosis via oxidative stress and enhances gemcitabine sensitivity in vitro and in vivo through targeting the NF-κB signaling pathway in pancreatic cancer
Source: publisher site journal article supplement (doi:10.18632/aging.103327), 2020-06-11
Supplement: Supplementary file [file aging-v12i11-103327-supplementary-material-SD1.pdf]

SUPPLEMENTARY FIGURE

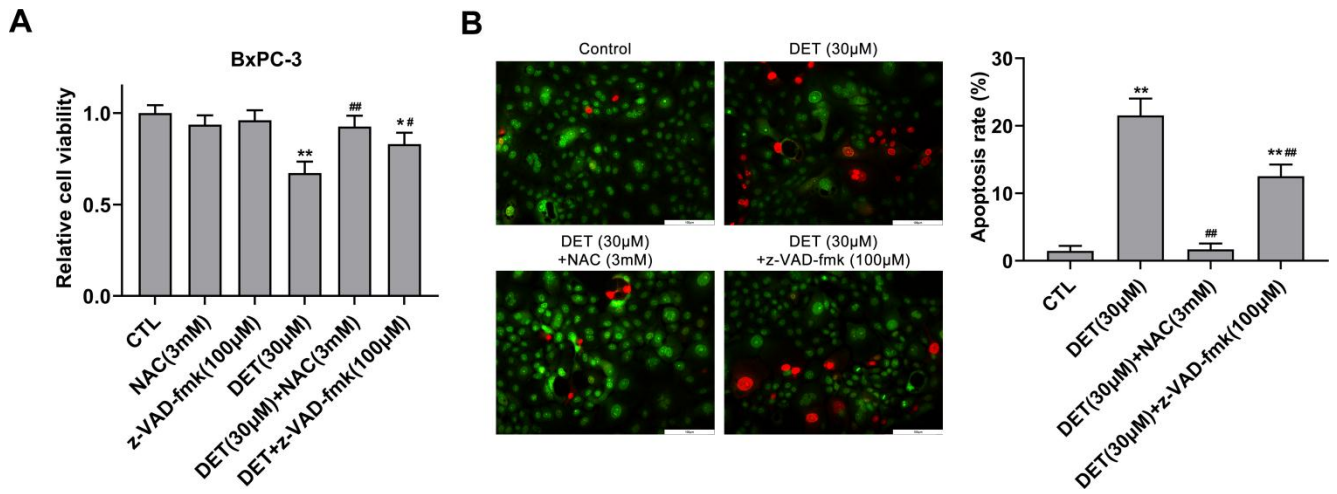

**Supplementary Figure 1. NAC and z-VAD-fmk inhibited DET-induced apoptosis in BxPC-3 cell.** (A) Pretreatment with NAC and z-VAD-fmk rescued DET-induced decline in cell viability, as shown by CCK-8 assay. \* $P < 0.05$ , \*\* $P < 0.01$  versus CTL. # $P < 0.05$ , ### $P < 0.01$  versus DET (30 μM) single treatment group. CTL, control. (B) NAC and z-VAD-fmk relieved DET-induced apoptosis in BxPC-3 cells, shown by AO/EB double staining assay. \*\* $P < 0.01$  versus CTL. ### $P < 0.01$  versus DET (30 μM) single treatment group. CTL, control. Magnification, × 200 (B). Scale bar, 100 μm (B). Data are shown as mean ± SD of at least three independent experiments.
